# Supplementary material for: Distant residues mediate picomolar binding affinity of a protein cofactor
Source: PubMed Central journal article supplement — Nat Commun. 2012 Aug 21;3:1010–. doi: 10.1038/ncomms2010 (PMC3432467; doi:10.1038/ncomms2010), 2012-08-21
Supplement: ncomms2010-s1.pdf [file ncomms2010-s1.pdf]

## **Supplementary Information**

### **Distant residues mediate picomolar-binding affinity of a protein cofactor**

**Yves J.M. Bollen<sup>1,2</sup>, Adrie H. Westphal<sup>2</sup>, Simon Lindhoud<sup>2</sup>, Willem J.H. van Berkel<sup>2</sup>  
and Carlo P.M. van Mierlo<sup>2\*</sup>**

<sup>1</sup>Department of Structural Biology, Vrije Universiteit, De Boelelaan 1085, 1081 HV Amsterdam, The Netherlands

<sup>2</sup>Laboratory of Biochemistry, Wageningen University, Dreijenlaan 3, 6703 HA Wageningen, The Netherlands

\*Corresponding author

Phone: +31 317 484621

Fax: +31 317 484801

E-mail:carlo.vanmierlo@wur.nl

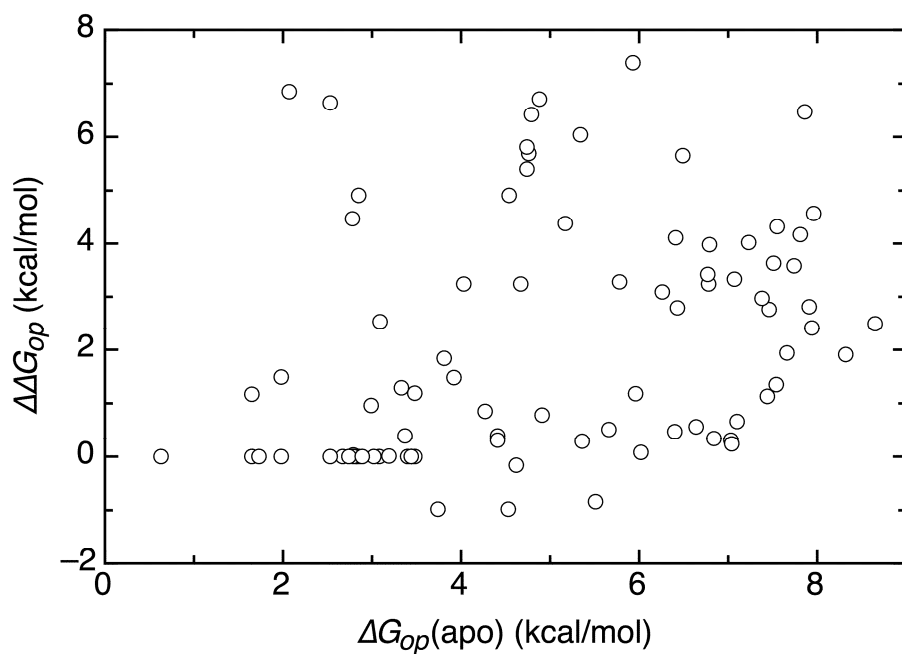

**Supplementary Figure S1. The magnitudes of  $\Delta\Delta G_{op}$ -values do not correlate with  $\Delta G_{op}(\text{apoflavodoxin})$ .** The difference in  $\Delta G_{op}$  at the residue level between apoflavodoxin and flavodoxin (i.e.,  $\Delta\Delta G_{op}$ ) as determined by H/D exchange at pD 6.3, 25 °C is plotted against the  $\Delta G_{op}$ -value at that particular residue in apoflavodoxin.

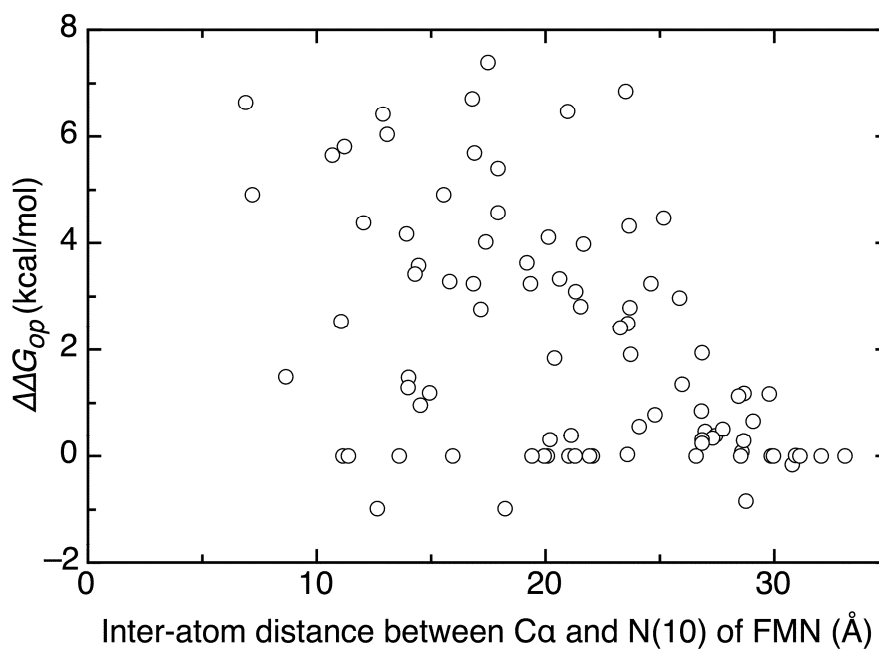

**Supplementary Figure S2. No significant correlation exists between the distance a residue has to FMN and  $\Delta\Delta G_{op}$ .** The difference in  $\Delta G_{op}$  at the residue level between apoflavodoxin and flavodoxin (i.e.,  $\Delta\Delta G_{op}$ ) as determined by H/D exchange at pD 6.3, 25 °C is plotted against the inter-atom distance between various C $\alpha$ -atoms and N(10) of FMN in flavodoxin (using pdb ID 1YOB).

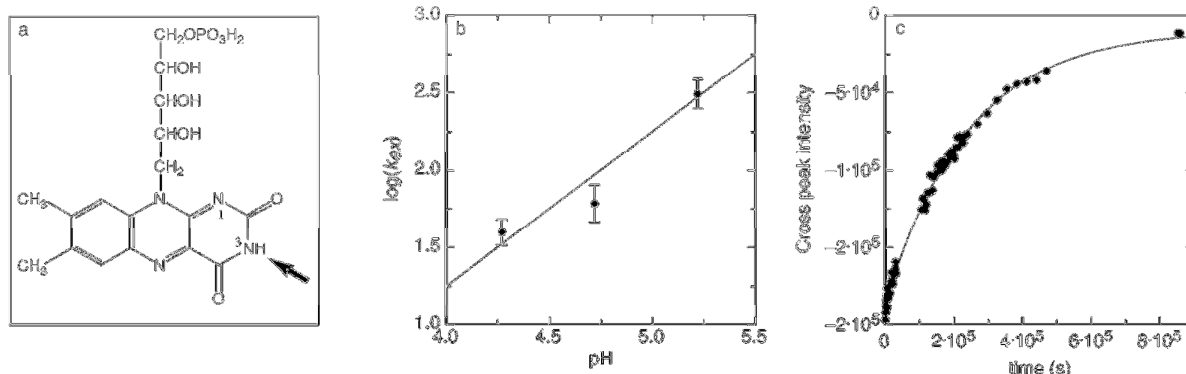

**Supplementary Figure S3. Hydrogen exchange of N(3)H of flavodoxin's cofactor. (a)**

Structure of FMN, with N(3)H indicated. (b) Fitting of a linear equation with a fixed slope of 1 to the pH-dependent exchange rates of N(3)H of FMN at 1.0 °C shows that the data are described by:  $\log(k_{ex}) = ((-2.75 \pm 0.05) + \text{pH})$ . Data points represent the rate constant as determined by fitting an exponential equation to selective saturation recovery NMR data, whereas error bars show the standard fitting error. In the linear fitting procedure, data points are weighted according to the standard error of the exponential fit. (c) H/D exchange curve obtained for N(3)H of flavodoxin at pD 6.3, 25 °C. Due to folding in the  $^{15}\text{N}$  dimension of the  $^1\text{H}$ - $^{15}\text{N}$  HSQC experiment this intensity is negative. The exchange rate is  $(3.803 \pm 0.007) \cdot 10^{-6} \text{ s}^{-1}$ .

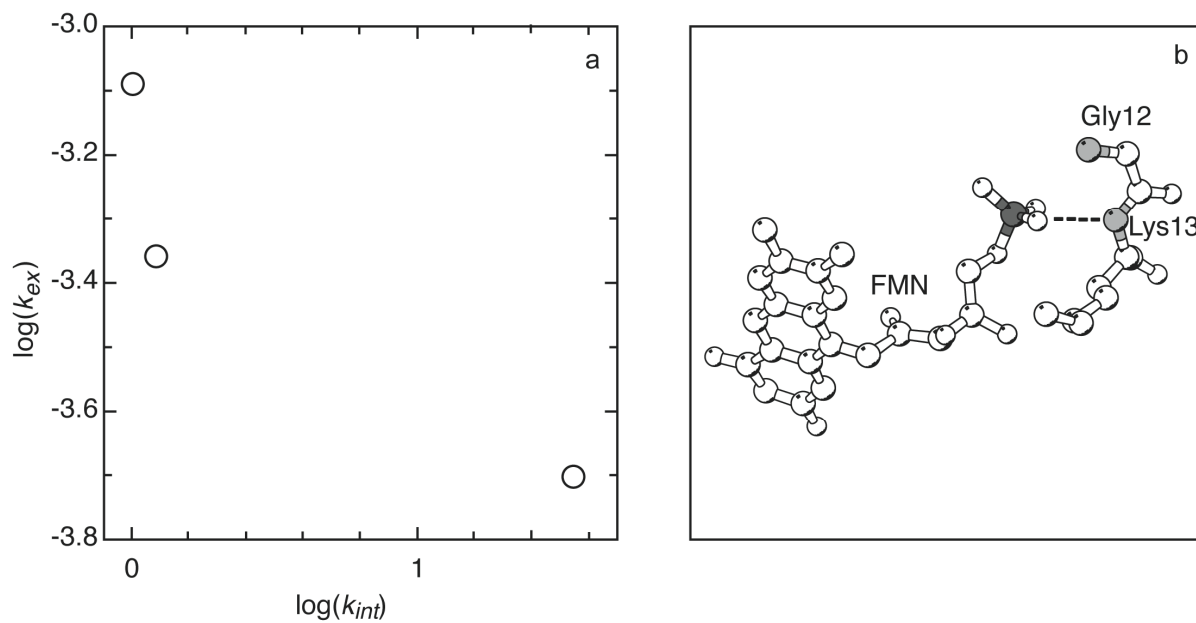

**Supplementary Figure S4. Exchange of the backbone amide of Lys13 decreases upon increasing pD.** (a)  $k_{ex}$  of Lys13 of flavodoxin as a function of intrinsic exchange rate,  $k_{int}$ . (b) The backbone amide of Lys13 is hydrogen bonded to the phosphate of FMN, as indicated by the dashed line. The graph is generated using Molscript<sup>55</sup>.

**Supplementary Table S1.** Amide proton exchange rates,  $k_{ex}$ , and stabilities against local opening,  $\Delta G_{op}$ , of flavodoxin (pD 6.26) and apoflavodoxin (pD 6.28). The proteins are in 100 mM KPPI, 25 °C.<sup>a</sup>

| Residue | $k_{ex}$ (flavodoxin) | $\Delta G_{op}$ (flavodoxin) | $k_{ex}$ (apoflavodoxin) | $\Delta G_{op}$ (apoflavodoxin) | $\Delta\Delta G_{op}$ |
|---------|-----------------------|------------------------------|--------------------------|---------------------------------|-----------------------|
| 1 Ala   | -                     | -                            | -                        | -                               | -                     |
| 2 Lys   | -                     | -                            | > 0.01                   | < 4.82                          | -                     |
| 3 Ile   | 1.91 E-06             | 6.87                         | 0.44 E-05                | 6.40                            | 0.47                  |
| 4 Gly   | -                     | -                            | -                        | -                               | -                     |
| 5 Leu   | 4.07 E-09             | 10.77                        | 0.36 E-05                | 6.79                            | 3.98                  |
| 6 Phe   | 1.97 E-09             | 11.14                        | 0.97 E-06                | 7.51                            | 3.63                  |
| 7 Phe   | 3.46 E-08 (pD 8.82)   | 13.29                        | -                        | -                               | -                     |
| 8 Gly   | 7.87 E-09             | 11.38                        | 0.23 E-03                | 5.34                            | 6.04                  |
| 9 Ser   | -                     | -                            | -                        | -                               | -                     |
| 10 Asn  | > 0.01                | < 3.72                       | -                        | -                               | -                     |
| 11 Thr  | > 0.01                | < 2.98                       | -                        | -                               | -                     |
| 12 Gly  | -                     | -                            | -                        | -                               | -                     |
| 13 Lys  | 4.37 E-04             | 4.67                         | -                        | -                               | -                     |
| 14 Thr  | 4.33 E-06             | 7.28                         | -                        | -                               | -                     |
| 15 Arg  | 5.44 E -07            | 8.82                         | -                        | -                               | -                     |
| 16 Lys  | 7.16 E-07             | 8.52                         | -                        | -                               | -                     |
| 17 Val  | 2.56 E-08             | 9.45                         | 0.11 E-03                | 4.54                            | 4.91                  |
| 18 Ala  | < 1 E-10              | > 13.32                      | 0.29 E-04                | 5.93                            | > 7.39                |
| 19 Lys  | 1.45 E-08             | 10.52                        | 0.16 E-04                | 6.41                            | 4.11                  |
| 20 Ser  | -                     | -                            | > 0.01                   | < 3.33                          | -                     |
| 21 Ile  | 4.29 E-08             | 9.35                         | 0.84 E-05                | 6.26                            | 3.09                  |
| 22 Lys  | 7.68 E-08             | 9.22                         | 0.92 E-05                | 6.43                            | 2.79                  |
| 23 Lys  | 4.88 E-06             | 7.25                         | > 0.01                   | < 2.78                          | > 4.47                |
| 24 Arg  | 4.12 E-04             | 4.80                         | 0.83 E-03                | 4.41                            | 0.39                  |
| 25 Phe  | 4.64 E-06             | 7.14                         | 0.36 E-04                | 5.96                            | 1.18                  |
| 26 Asp  | > 0.01                | < 2.32                       | -                        | -                               | -                     |
| 27 Asp  | -                     | -                            | -                        | -                               | -                     |
| 28 Glu  | -                     | -                            | > 0.01                   | < 1.73                          | -                     |
| 29 Thr  | 1.52 E-03 (pD 6.19)   | 3.36                         | -                        | -                               | -                     |
| 30 Met  | 3.93 E-05             | 6.17                         | 0.98 E-04                | 5.66                            | 0.51                  |
| 31 Ser  | 4.50 E-04             | 5.12                         | ~ 2 E-03                 | ~ 4.27                          | ~ 0.85                |
| 32 Asp  | -                     | -                            | > 0.01                   | < 2.67                          | -                     |
| 33 Ala  | 9.87 E-04             | 3.76                         | ~ 2 E-03                 | ~ 3.37                          | ~ 0.39                |
| 34 Leu  | 3.81 E-08             | 9.22                         | -                        | -                               | -                     |
| 35 Asn  | > 0.01                | < 3.02                       | -                        | -                               | -                     |
| 36 Val  | -                     | -                            | -                        | -                               | -                     |
| 37 Asn  | 5.89 E-05             | 6.15                         | -                        | -                               | -                     |

| Residue | $k_{ex}(\text{flavodoxin})$ | $\Delta G_{op}(\text{flavodoxin})$ | $k_{ex}(\text{apoflavodoxin})$ | $\Delta G_{op}(\text{apoflavodoxin})$ | $\Delta\Delta G_{op}$ |       |
|---------|-----------------------------|------------------------------------|--------------------------------|---------------------------------------|-----------------------|-------|
| 38      | Arg                         | 1.85 E-03                          | 4.18                           | -                                     | -                     | -     |
| 39      | Val                         | 2.58 E-04                          | 4.15                           | -                                     | -                     | -     |
| 40      | Ser                         | > 0.01                             | < 2.95                         | -                                     | -                     | -     |
| 41      | Ala                         | > 0.01                             | < 3.05                         | > 0.01                                | < 3.08                | ~ 0   |
| 42      | Glu                         | > 0.01                             | < 1.95                         | > 0.01                                | < 1.98                | ~ 0   |
| 43      | Asp                         | -                                  | -                              | 7.02 E-03                             | 2.27                  | -     |
| 44      | Phe                         | -                                  | -                              | -                                     | -                     | -     |
| 45      | Ala                         | 3.27 E-05                          | 6.10                           | 0.39 E-04                             | 6.02                  | 0.08  |
| 46      | Gln                         | 4.49 E-04 (pD 6.19)                | 4.46                           | 0.42 E -03                            | 4.62                  | -0.16 |
| 47      | Tyr                         | 2.75 E-04                          | 4.67                           | 0.69 E-04                             | 5.51                  | -0.84 |
| 48      | Gln                         | > 0.01                             | < 2.79                         | > 0.01                                | < 2.82                | ~ 0   |
| 49      | Phe                         | 4.14 E-06                          | 7.18                           | 0.78 E-05                             | 6.84                  | 0.34  |
| 50      | Leu                         | 1.69 E-09                          | 11.14                          | 0.12 E-06                             | 8.65                  | 2.49  |
| 51      | Ile                         | 2.23 E-09                          | 10.40                          | 0.66 E-06                             | 7.07                  | 3.33  |
| 52      | Leu                         | 7.11 E-10                          | 11.25                          | 0.68 E-06                             | 7.23                  | 4.02  |
| 53      | Gly                         | 1.53 E-09                          | 11.98                          | 0.19 E-05                             | 7.81                  | 4.17  |
| 54      | Thr                         | 2.03 E-09                          | 11.87                          | -                                     | -                     | -     |
| 55      | Pro                         | -                                  | -                              | -                                     | -                     | -     |
| 56      | Thr                         | 2.04 E-07                          | 8.59                           | -                                     | -                     | -     |
| 57      | Leu                         | 6.57 E-04                          | 3.73                           | -                                     | -                     | -     |
| 58      | Gly                         | 1.01 E-03                          | 4.08                           | -                                     | -                     | -     |
| 59      | Glu                         | > 0.01                             | < 2.18                         | -                                     | -                     | -     |
| 60      | Gly                         | 8.64 E-04                          | 4.25                           | -                                     | -                     | -     |
| 61      | Glu                         | 3.98 E-04                          | 4.08                           | -                                     | -                     | -     |
| 62      | Leu                         | ~ 2 E-03                           | ~ 2.60                         | -                                     | -                     | -     |
| 63      | Pro                         | -                                  | -                              | -                                     | -                     | -     |
| 64      | Gly                         | 1.54 E-03 (pD 6.19)                | 3.69                           | -                                     | -                     | -     |
| 65      | Leu                         | 1.27 E-03                          | 3.30                           | -                                     | -                     | -     |
| 66      | Ser                         | > 0.01                             | < 2.86                         | -                                     | -                     | -     |
| 67      | Ser                         | -                                  | -                              | -                                     | -                     | -     |
| 68      | Asp                         | > 0.01                             | < 2.64                         | > 0.01                                | < 2.67                | ~ 0   |
| 69      | Ala                         | -                                  | -                              | > 0.01                                | < 2.42                | -     |
| 70      | Glu                         | > 0.01                             | < 1.95                         | -                                     | -                     | -     |
| 71      | Asn                         | > 0.01                             | < 3.10                         | -                                     | -                     | -     |
| 72      | Glu                         | > 0.01                             | < 2.38                         | -                                     | -                     | -     |
| 73      | Ser                         | 1.97 E-04                          | 5.26                           | -                                     | -                     | -     |
| 74      | Trp                         | 2.04 E-04                          | 4.79                           | -                                     | -                     | -     |
| 75      | Glu                         | 2.43 E-04                          | 3.99                           | -                                     | -                     | -     |
| 76      | Glu                         | 1.73 E-05                          | 5.50                           | -                                     | -                     | -     |
| 77      | Phe                         | 7.53 E-07                          | 7.71                           | -                                     | -                     | -     |
| 78      | Leu                         | -                                  | -                              | -                                     | -                     | -     |

| Residue | $k_{ex}(\text{flavodoxin})$ | $\Delta G_{op}(\text{flavodoxin})$ | $k_{ex}(\text{apoflavodoxin})$ | $\Delta G_{op}(\text{apoflavodoxin})$ | $\Delta\Delta G_{op}$ |        |
|---------|-----------------------------|------------------------------------|--------------------------------|---------------------------------------|-----------------------|--------|
| 79      | Pro                         | -                                  | -                              | -                                     | -                     |        |
| 80      | Lys                         | 6.63 E-06                          | 6.58                           | -                                     | -                     |        |
| 81      | Ile                         | 9.14 E-09                          | 10.02                          | 0.23 E-05                             | 6.78                  | 3.24   |
| 82      | Glu                         | 1.03 E-05                          | 5.69                           | 0.41 E-04                             | 4.91                  | 0.78   |
| 83      | Gly                         | > 0.01                             | < 2.80                         | > 0.01                                | < 2.83                | ~ 0    |
| 84      | Leu                         | 2.38 E-05                          | 5.65                           | 0.41 E-04                             | 5.36                  | 0.29   |
| 85      | Asp                         | -                                  | -                              | -                                     | -                     | -      |
| 86      | Phe                         | -                                  | -                              | > 0.01                                | < 2.10                | -      |
| 87      | Ser                         | -                                  | -                              | 0.42 E-03                             | 5.12                  | -      |
| 88      | Gly                         | > 0.01                             | < 3.42                         | > 0.01                                | < 3.44                | ~ 0    |
| 89      | Lys                         | 2.32 E-06                          | 7.76                           | 0.74 E-05                             | 7.10                  | 0.66   |
| 90      | Thr                         | -                                  | -                              | 0.37 E-05                             | 7.40                  | -      |
| 91      | Val                         | 6.74 E-09                          | 10.35                          | 0.42 E-06                             | 7.94                  | 2.41   |
| 92      | Ala                         | 6.50 E-09 (pD 8.82)                | 14.33                          | 0.11 E-05                             | 7.86                  | 6.47   |
| 93      | Leu                         | 6.93 E-09                          | 10.22                          | 0.78 E-06                             | 7.46                  | 2.76   |
| 94      | Phe                         | 1.46 E-09                          | 11.32                          | 0.66 E-06                             | 7.74                  | 3.58   |
| 95      | Gly                         | 2.18 E-09                          | 12.14                          | 0.33 E-04                             | 6.49                  | 5.65   |
| 96      | Leu                         | 1.67 E-07 (pD 8.82)                | 12.05                          | -                                     | -                     | -      |
| 97      | Gly                         | -                                  | -                              | > 0.01                                | < 2.75                | -      |
| 98      | Asp                         | 2.49 E-07                          | 8.72                           | -                                     | -                     | -      |
| 99      | Gln                         | 2.25 E-08                          | 10.15                          | -                                     | -                     | -      |
| 100     | Val                         | 2.63 E-06 (pD 7.73)                | 8.82                           | -                                     | -                     | -      |
| 101     | Gly                         | 2.32 E-06                          | 7.76                           | > 0.01                                | < 2.85                | > 4.91 |
| 102     | Tyr                         | 1.25 E-07                          | 9.17                           | > 0.01                                | < 2.53                | > 6.64 |
| 103     | Pro                         | -                                  | -                              | -                                     | -                     | -      |
| 104     | Glu                         | > 0.01                             | < 1.62                         | > 0.01                                | < 1.65                | ~ 0    |
| 105     | Asn                         | 8.01 E-05                          | 5.95                           | -                                     | -                     | -      |
| 106     | Tyr                         | 3.91 E-08                          | 10.06                          | -                                     | -                     | -      |
| 107     | Leu                         | > 0.01                             | < 1.92                         | -                                     | -                     | -      |
| 108     | Asp                         | 5.68 E-07 (pD 8.82)                | 11.19                          | -                                     | -                     | -      |
| 109     | Ala                         | -                                  | -                              | -                                     | -                     | -      |
| 110     | Leu                         | 2.15 E-08                          | 9.55                           | 0.38 E-04                             | 5.17                  | 4.38   |
| 111     | Gly                         | 3.18 E-08                          | 10.19                          | 0.11 E-04                             | 6.77                  | 3.42   |
| 112     | Glu                         | 2.76 E-04                          | 4.30                           | -                                     | -                     | -      |
| 113     | Leu                         | 3.50 E-08                          | 9.06                           | 0.96 E-05                             | 5.78                  | 3.28   |
| 114     | Tyr                         | 6.35 E-08 (pD 8.82)                | 12.53                          | 0.42 E-06                             | 7.96                  | 4.57   |
| 115     | Ser                         | -                                  | -                              | 0.60 E-05                             | 7.62                  | -      |
| 116     | Phe                         | -                                  | -                              | 0.13 E-05                             | 8.03                  | -      |
| 117     | Phe                         | -                                  | -                              | 0.57 E-06                             | 8.19                  | -      |
| 118     | Lys                         | 2.74 E-08                          | 10.23                          | 0.73 E-06                             | 8.32                  | 1.91   |
| 119     | Asp                         | 3.85 E-04                          | 4.32                           | -                                     | -                     | -      |



| Residue | $k_{ex}(\text{flavodoxin})$ | $\Delta G_{op}(\text{flavodoxin})$ | $k_{ex}(\text{apoflavodoxin})$ | $\Delta G_{op}(\text{apoflavodoxin})$ | $\Delta\Delta G_{op}$ |         |
|---------|-----------------------------|------------------------------------|--------------------------------|---------------------------------------|-----------------------|---------|
| 120     | Arg                         | 2.83 E-06                          | 7.33                           | 0.49 E-05                             | 7.03                  | 0.31    |
| 121     | Gly                         | 5.24 E-04 (pD 6.19)                | 4.95                           | -                                     | -                     | -       |
| 122     | Ala                         | -                                  | -                              | -                                     | -                     | -       |
| 123     | Lys                         | 3.49 E-06                          | 7.28                           | 0.55 E-05                             | 7.04                  | 0.24    |
| 124     | Ile                         | 1.83 E-03                          | 2.82                           | ~ 2 E-03                              | ~ 2.79                | ~ 0.03  |
| 125     | Val                         | 5.16 E-07                          | 7.20                           | 0.14 E-05                             | 6.64                  | 0.56    |
| 126     | Gly                         | > 0.01                             | < 2.82                         | > 0.01                                | < 2.85                | ~ 0     |
| 127     | Ser                         | > 0.01                             | < 3.38                         | > 0.01                                | < 3.40                | ~ 0     |
| 128     | Trp                         | 1.02 E-06                          | 7.91                           | 0.26 E-03                             | 4.67                  | 3.24    |
| 129     | Ser                         | > 0.01                             | < 3.00                         | > 0.01                                | < 3.02                | ~ 0     |
| 130     | Thr                         | -                                  | -                              | ~ 2 E-03                              | ~ 3.93                | -       |
| 131     | Asp                         | 1.71 E-03                          | 3.55                           | ~ 2 E-03                              | ~ 3.48                | ~ 0.07  |
| 132     | Gly                         | > 0.01                             | < 2.76                         | ~ 2 E-03                              | ~ 3.74                | > -0.98 |
| 133     | Tyr                         | 2.56 E-04                          | 4.67                           | ~ 2 E-03                              | ~ 3.48                | ~ 1.19  |
| 134     | Glu                         | 3.78 E-04                          | 3.95                           | ~ 2 E-03                              | ~ 2.99                | ~ 0.96  |
| 135     | Phe                         | 1.81 E-03                          | 3.12                           | -                                     | -                     | -       |
| 136     | Glu                         | -                                  | -                              | ~ 2 E-03                              | ~ 3.01                | -       |
| 137     | Ser                         | 1.54 E-04                          | 5.40                           | ~ 2 E-03                              | ~ 3.92                | ~ 1.48  |
| 138     | Ser                         | > 0.01                             | < 3.55                         | ~ 2 E-03                              | ~ 4.53                | > -0.98 |
| 139     | Glu                         | 2.14 E-04                          | 4.62                           | ~ 2 E-03                              | ~ 3.33                | ~ 1.29  |
| 140     | Ala                         | -                                  | -                              | 0.49 E-03                             | 4.24                  | -       |
| 141     | Val                         | 7.86 E-07                          | 7.27                           | 0.20 E-03                             | 4.03                  | 3.24    |
| 142     | Val                         | 8.76 E-06                          | 5.65                           | 0.21 E-03                             | 3.81                  | 1.84    |
| 143     | Asp                         | 7.45 E-08 (pD 6.19)                | 8.92                           | > 0.01                                | < 2.07                | > 6.85  |
| 144     | Gly                         | > 0.01                             | < 2.76                         | > 0.01                                | < 2.79                | ~ 0     |
| 145     | Lys                         | 4.01 E-04                          | 4.72                           | 0.71 E-03                             | 4.41                  | 0.31    |
| 146     | Phe                         | 1.43 E-08                          | 10.42                          | 0.22 E-03                             | 4.76                  | 5.69    |
| 147     | Val                         | 6.92 E-09                          | 10.14                          | 0.69 E-04                             | 4.74                  | 5.40    |
| 148     | Gly                         | 3.47 E-09                          | 11.59                          | 0.32 E-03                             | 4.88                  | 6.71    |
| 149     | Leu                         | -                                  | -                              | -                                     | -                     | -       |
| 150     | Ala                         | 3.04 E-09                          | 11.21                          | 0.17 E-03                             | 4.79                  | 6.42    |
| 151     | Leu                         | 3.96 E-09                          | 10.55                          | 0.78 E-04                             | 4.74                  | 5.81    |
| 152     | Asp                         | > 0.01                             | < 1.95                         | -                                     | -                     | -       |
| 153     | Leu                         | 9.93 E-04                          | 2.97                           | -                                     | -                     | -       |
| 154     | Asp                         | 7.54 E-04                          | 3.47                           | > 0.01                                | < 1.98                | > 1.49  |
| 155     | Asn                         | 1.31 E-04                          | 5.62                           | > 0.01                                | < 3.09                | > 2.53  |
| 156     | Gln                         | -                                  | -                              | -                                     | -                     | -       |
| 157     | Ser                         | > 0.01                             | < 3.42                         | > 0.01                                | < 3.44                | ~ 0     |
| 158     | Gly                         | -                                  | -                              | -                                     | -                     | -       |
| 159     | Lys                         | > 0.01                             | < 2.82                         | -                                     | -                     | -       |
| 160     | Thr                         | > 0.01                             | < 2.71                         | > 0.01                                | < 2.74                | ~ 0     |

| Residue | $k_{ex}(\text{flavodoxin})$ | $\Delta G_{op}(\text{flavodoxin})$ | $k_{ex}(\text{apoflavodoxin})$ | $\Delta G_{op}(\text{apoflavodoxin})$ | $\Delta\Delta G_{op}$ |
|---------|-----------------------------|------------------------------------|--------------------------------|---------------------------------------|-----------------------|
| 161 Asp | > 0.01                      | < 2.51                             | > 0.01                         | < 2.53                                | ~ 0                   |
| 162 Glu | > 0.01                      | < 1.70                             | > 0.01                         | < 1.73                                | ~ 0                   |
| 163 Arg | 1.09 E-05                   | 6.57                               | -                              | -                                     | -                     |
| 164 Val | -                           | -                                  | 0.14 E-04                      | 5.89                                  | -                     |
| 165 Ala | -                           | -                                  | 0.95 E-05                      | 6.58                                  | -                     |
| 166 Ala | -                           | -                                  | 0.28 E-04                      | 6.14                                  | -                     |
| 167 Trp | 1.31 E-07 (pD 7.73)         | 10.72                              | 0.54 E-06                      | 7.91                                  | 2.81                  |
| 168 Leu | 1.19 E-07 (pD 8.82)         | 11.87                              | 0.52 E-06                      | 7.55                                  | 4.32                  |
| 169 Ala | 4.63 E-08                   | 9.60                               | 0.13 E-05                      | 7.66                                  | 1.94                  |
| 170 Gln | 2.87 E-07                   | 8.89                               | 0.30 E-05                      | 7.54                                  | 1.35                  |
| 171 Ile | 6.27 E-09                   | 10.35                              | 0.10 E-05                      | 7.38                                  | 2.97                  |
| 172 Ala | 2.57 E-07                   | 8.57                               | 0.18 E-05                      | 7.44                                  | 1.13                  |
| 173 Pro | -                           | -                                  | -                              | -                                     | -                     |
| 174 Glu | 1.08 E-03 (pD 6.19)         | 2.82                               | > 0.01                         | < 1.65                                | > 1.17                |
| 175 Phe | 2.60 E-06                   | 6.98                               | -                              | -                                     | -                     |
| 176 Gly | -                           | -                                  | -                              | -                                     | -                     |
| 177 Leu | 1.57 E-03                   | 3.18                               | 0.16 E-02                      | 3.19                                  | 0.01                  |
| 178 Ser | > 0.01                      | < 2.86                             | > 0.01                         | < 2.89                                | ~ 0                   |
| 179 Leu | > 0.01                      | < 0.60                             | > 0.01                         | < 0.63                                | ~ 0                   |

<sup>a</sup> Rate constants for H/D exchange are in  $s^{-1}$ . Local stabilities against opening of flavodoxin ( $\Delta G_{op}(\text{flavodoxin})$ ) and of apoflavodoxin ( $\Delta G_{op}(\text{apoflavodoxin})$ ), as well as the differences in local stabilities between both proteins ( $\Delta\Delta G_{op}$ ;  $\Delta\Delta G_{op} = (\Delta G_{op}(\text{flavodoxin}) - \Delta G_{op}(\text{apoflavodoxin}))$ ) are in kcal/mol. The standard deviation of  $\Delta G_{op}$  is  $\pm 0.35$  kcal/mol (see Materials and Methods) and thus the standard deviation in  $\Delta\Delta G_{op}$  determination is calculated to be 0.50 kcal/mol. In case of rapidly exchanging amide protons that are not observed in the first HSQC spectrum of the protein in  $^2H_2O$ ,  $k_{ex}$  is set to be  $> 0.01 s^{-1}$ . Exchange rates of residues 41, 42, 48, 68, 83, 88, 104, 126, 127, 129, 144, 157, 160, 161, 162, 178 and 179 of both proteins are  $> 0.01 s^{-1}$ . For each of these residues upper limits of the corresponding  $\Delta G_{op}$ -values are calculated and as these limits are virtually identical for both proteins the corresponding  $\Delta\Delta G_{op}$  is set to  $\sim 0$ . In case of residues showing backbone amide cross peak intensities in the first two HSQC spectra acquired but displaying no such intensities in the third HSQC spectrum,  $k_{ex}$  is estimated to be  $\sim 2 E-03 s^{-1}$ . A (-) indicates that the exchange rate could not be determined, which is due to either unassigned cross peaks, overlapping cross peaks, or the residue being a proline. In case of some residues changing pD resolves cross peak overlap and as a result  $k_{ex}$  can be determined and thus is reported (for example,  $k_{ex} = 3.46 E-08$  (pD 8.82) is  $k_{ex}$  obtained at pD 8.82). Equation S7, together with the appropriate  $k_{int}$ -values, has been used to calculate all  $\Delta G_{op}$ -values.

**Supplementary Table S2.** Dependence of H/D exchange rates,  $k_{ex}$ , of backbone amides of flavodoxin on pD.<sup>a</sup> The corresponding rates for local opening,  $k_{op}$ , and closing,  $k_{cl}$ , of the protein structure are calculated as described in the main text.<sup>b</sup> Buffer is 100 mM KPPI, temperature is 25 °C.

| Residue | $k_{ex}(6.19)$ | $k_{ex}(6.26)$ | $k_{ex}(7.73)$ | $k_{ex}(8.82)$ | $k_{op}$             | $k_{cl}$      |
|---------|----------------|----------------|----------------|----------------|----------------------|---------------|
| 3       | 8.29E-07       | 1.91E-06       |                |                |                      |               |
| 5       | no exch.       | 4.07E-09       | 6.56E-07       | 2.90E-06       |                      |               |
| 6       | no exch.       | 1.97E-09       | no exch.       | 1.15E-08       | 1.16E-08             | 1.57          |
| 7       | no exch.       | no exch.       |                | 3.46E-08       |                      |               |
| 8       | no exch.       | 7.87E-09       | 8.89E-07       | 2.79E-06       |                      |               |
| 13      | 8.13E-04       | 4.37E-04       | 1.98E-04       |                |                      |               |
| 14      | 4.60E-06       | 4.33E-06       | 3.19E-05       | 2.11E-04       | 1.67E-04 ± 1.12E-04  | 41.75 ± 37.28 |
| 15      |                | 5.44E-07       | 4.17E-05       | 1.56E-04       |                      |               |
| 16      | 4.70E-07       | 7.16E-07       | 2.42E-04       |                |                      |               |
| 17      | no exch.       | 2.56E-08       | 1.02E-05       | 4.65E-05       |                      |               |
| 19      | no exch.       | 1.45E-08       | 2.85E-06       | 1.80E-05       |                      |               |
| 21      |                | 4.29E-08       | 1.22E-05       | 8.65E-05       |                      |               |
| 22      | 6.85E-08       | 7.68E-08       | 3.26E-05       | 1.97E-04       |                      |               |
| 23      | 1.80E-06       | 4.88E-06       |                |                |                      |               |
| 24      | 1.34E-04       | 4.12E-04       |                |                |                      |               |
| 25      | 1.94E-06       | 4.64E-06       |                |                |                      |               |
| 29      | 1.52E-03       |                |                |                |                      |               |
| 30      | 1.34E-05       | 3.93E-05       |                |                |                      |               |
| 31      | 1.56E-04       | 4.50E-04       |                |                |                      |               |
| 33      | 8.48E-04       | 9.87E-04       |                |                |                      |               |
| 34      | 8.11E-08       | 3.81E-08       | 8.03E-06       | 3.75E-05       |                      |               |
| 37      | 2.11E-05       | 5.89E-05       |                |                |                      |               |
| 38      | 7.67E-04       | 1.85E-03       |                |                |                      |               |
| 39      | 8.29E-05       | 2.58E-04       |                |                |                      |               |
| 45      | 1.06E-05       | 3.27E-05       |                |                |                      |               |
| 46      | 4.49E-04       |                |                |                |                      |               |
| 47      | 4.89E-05       | 2.75E-04       |                |                |                      |               |
| 49      | 1.70E-06       | 4.14E-06       |                |                |                      |               |
| 50      | no exch.       | 1.69E-09       | no exch.       | 1.08E-08       |                      |               |
| 51      | no exch.       | 2.23E-09       |                | 8.87E-09       | 7.59E-09 ± 2.01E-09* | 0.84 ± 0.44*  |
| 52      | no exch.       | 7.11 E-10      | no exch.       | 6.29E-09       | 7.59E-09 ± 2.01E-09* | 0.84 ± 0.44*  |
| 53      | no exch.       | 1.53E-09       |                | 1.04E-08       | 7.59E-09 ± 2.01E-09* | 0.84 ± 0.44*  |
| 54      | no exch.       | 2.03E-09       | no exch.       | 2.64E-08       |                      |               |
| 56      | 8.90E-08       | 2.04E-07       | 1.15E-06       | 4.73E-06       | 3.90E-06 ± 2.09E-06  | 12.79 ± 9.36  |
| 57      | 6.85E-04       | 6.57E-04       |                |                |                      |               |
| 58      | 4.76E-04       | 1.01E-03       |                |                |                      |               |
| 60      | 6.15E-04       | 8.64E-04       |                |                |                      |               |
| 61      |                | 3.98E-04       |                |                |                      |               |

| <b>Residue</b> | <b><math>k_{ex}(6.19)</math></b> | <b><math>k_{ex}(6.26)</math></b> | <b><math>k_{ex}(7.73)</math></b> | <b><math>k_{ex}(8.82)</math></b> | <b><math>k_{op}</math></b> | <b><math>k_{cl}</math></b> |
|----------------|----------------------------------|----------------------------------|----------------------------------|----------------------------------|----------------------------|----------------------------|
| 64             | 1.54E-03                         |                                  |                                  |                                  |                            |                            |
| 65             | 8.32E-04                         | 1.27E-03                         |                                  |                                  |                            |                            |
| 73             | 2.52E-04                         | 1.97E-04                         |                                  |                                  |                            |                            |
| 74             | 1.90E-04                         | 2.04E-04                         |                                  |                                  |                            |                            |
| 75             |                                  | 2.43E-04                         |                                  |                                  |                            |                            |
| 76             |                                  | 1.73E-05                         |                                  |                                  |                            |                            |
| 77             | 5.70E-07                         | 7.53E-07                         | 1.59E-04                         |                                  |                            |                            |
| 80             | 5.20E-06                         | 6.63E-06                         |                                  |                                  |                            |                            |
| 81             | no exch.                         | 9.14E-09                         | 2.79E-06                         | 1.36E-05                         |                            |                            |
| 82             | 4.97E-06                         | 1.03E-05                         |                                  |                                  |                            |                            |
| 84             | 7.97E-06                         | 2.38E-05                         |                                  |                                  |                            |                            |
| 89             | 1.04E-06                         | 2.32E-06                         |                                  |                                  |                            |                            |
| 91             | no exch.                         | 6.74E-09                         | 2.20E-06                         | 9.28E-06                         |                            |                            |
| 92             | no exch.                         | no exch.                         | no exch.                         | 6.50E-09                         | 7.59E-09 ± 2.01E-09*       | 0.84 ± 0.44*               |
| 93             | no exch.                         | 6.93E-09                         | 9.72E-07                         | 4.42E-06                         |                            |                            |
| 94             | no exch.                         | 1.46E-09                         | no exch.                         | 8.76E-09                         | 7.59E-09 ± 2.01E-09*       | 0.84 ± 0.44*               |
| 95             | no exch.                         | 2.18E-09                         | no exch.                         | 2.12E-07                         |                            |                            |
| 96             | no exch.                         | no exch.                         | no exch.                         | 1.67E-07                         |                            |                            |
| 98             | 1.18E-07                         | 2.49E-07                         | 3.33E-07                         | 3.31E-07                         | 3.43E-07 ± 8.20E-08        | 0.63 ± 0.42                |
| 99             |                                  | 2.25E-08                         | 3.35E-06                         | 2.15E-05                         |                            |                            |
| 100            | no exch.                         |                                  | 2.63E-06                         | 1.19E-05                         |                            |                            |
| 101            | 2.70E-06                         | 2.32E-06                         | 1.03E-04                         |                                  |                            |                            |
| 102            | no exch.                         | 1.25E-07                         | 2.88E-07                         | 4.65E-07                         | 3.84E-07 ± 8.46E-08        | 1.52 ± 0.85                |
| 105            | 3.77E-05                         | 8.01E-05                         |                                  |                                  |                            |                            |
| 106            | no exch.                         | 3.91E-08                         | 9.35E-06                         | 5.45E-05                         |                            |                            |
| 108            |                                  | no exch.                         | 3.88E-07                         | 5.68E-07                         |                            |                            |
| 110            | no exch.                         | 2.15E-08                         | 4.43E-06                         | 2.20E-05                         |                            |                            |
| 111            |                                  | 3.18E-08                         | 6.97E-06                         | 4.52E-05                         |                            |                            |
| 112            | 1.46E-04                         | 2.76E-04                         |                                  |                                  |                            |                            |
| 113            | 1.56E-07                         | 3.50E-08                         |                                  |                                  |                            |                            |
| 114            | no exch.                         | no exch.                         | no exch.                         | 6.35E-08                         |                            |                            |
| 118            | no exch.                         | 2.74E-08                         | 1.01E-05                         | 6.24E-05                         |                            |                            |
| 119            | 2.95E-04                         | 3.85E-04                         |                                  |                                  |                            |                            |
| 120            | 1.41E-06                         | 2.83E-06                         |                                  |                                  |                            |                            |
| 121            | 5.24E-04                         |                                  |                                  |                                  |                            |                            |
| 123            | 1.45E-06                         | 3.49E-06                         |                                  |                                  |                            |                            |
| 124            | 5.47E-04                         | 1.83E-03                         |                                  |                                  |                            |                            |
| 125            | 3.75E-07                         | 5.16E-07                         | 1.80E-04                         |                                  |                            |                            |
| 128            | 4.92E-07                         | 1.02E-06                         | 4.52E-04                         |                                  |                            |                            |
| 131            | 9.23E-04                         | 1.71E-03                         |                                  |                                  |                            |                            |
| 133            |                                  | 2.56E-04                         |                                  |                                  |                            |                            |

| Residue | $k_{ex}(6.19)$ | $k_{ex}(6.26)$ | $k_{ex}(7.73)$ | $k_{ex}(8.82)$ | $k_{op}$            | $k_{cl}$      |
|---------|----------------|----------------|----------------|----------------|---------------------|---------------|
| 134     | 1.28E-04       | 3.78E-04       |                |                |                     |               |
| 135     | 8.37E-04       | 1.81E-03       |                |                |                     |               |
| 137     | 6.04E-05       | 1.54E-04       |                |                |                     |               |
| 139     | 2.67E-04       | 2.14E-04       |                |                |                     |               |
| 141     | 4.23E-07       | 7.86E-07       | 4.15E-04       |                |                     |               |
| 142     | 3.11E-06       | 8.76E-06       |                |                |                     |               |
| 143     | 7.45E-08       |                |                |                |                     |               |
| 145     |                | 4.01E-04       |                |                |                     |               |
| 146     | no exch.       | 1.43E-08       | 5.63E-06       | 3.13E-05       |                     |               |
| 147     | no exch.       | 6.92E-09       | 2.34E-06       | 1.16E-05       |                     |               |
| 148     | no exch.       | 3.47E-09       | 1.46E-07       | 2.89E-07       | 4.04E-07 ± 2.46E-07 | 106.9 ± 89.45 |
| 150     | no exch.       | 3.04E-09       | 4.00E-07       | 2.91E-07       |                     |               |
| 151     |                | 3.96E-09       |                |                |                     |               |
| 153     | 2.59E-04       | 9.93E-04       |                |                |                     |               |
| 154     |                | 7.54E-04       |                |                |                     |               |
| 155     | 4.90E-05       | 1.31E-04       |                |                |                     |               |
| 163     | 3.85E-06       | 1.09E-05       |                |                |                     |               |
| 167     | no exch.       | no exch.       | 1.31E-07       | 5.12E-07       |                     |               |
| 168     | no exch.       | no exch.       | no exch.       | 1.19E-07       |                     |               |
| 169     |                | 4.63E-08       | 2.06E-05       | 9.20E-05       |                     |               |
| 170     | 1.83E-07       | 2.87E-07       | 1.66E-04       |                |                     |               |
| 171     |                | 6.27E-09       | 4.26E-06       | 2.53E-05       |                     |               |
| 172     |                | 2.57E-07       |                |                |                     |               |
| 174     | 1.08E-03       |                |                |                |                     |               |
| 175     | 1.26E-06       | 2.60E-06       |                |                |                     |               |
| 177     | 5.12E-04       | 1.57E-03       |                |                |                     |               |

<sup>a</sup> Rate constants for H/D exchange of flavodoxin are in  $s^{-1}$ . Backbone amide protons that show no exchange during the time course of an exchange experiment at a particular pD-value are indicated with “no exch.”. Residues that are not incorporated in the table either have backbone amide protons that show no exchange at all pD-values used, or exchange too rapidly to follow by NMR spectroscopy at all pD-values used, or have unassigned  $^1H$ - $^{15}N$  cross peaks, or have overlapping  $^1H$ - $^{15}N$  cross peaks, or are prolines. Experiments are done at the specific pD-value indicated. For example,  $k_{ex}(6.19)$  is the H/D exchange rate determined in a native state exchange experiment at pD 6.19 (uncorrected pH-meter reading). Protein concentration ranges between 2.5 and 3 mM.

<sup>b</sup> Opening and closing rates (in  $s^{-1}$ ) are determined by fitting equation S4 to the curving dependence of  $k_{ex}$  on pD. Rates marked with \* are determined by globally fitting this equation to the pD-dependent exchange data of Ile 51, Leu 52, Gly 53, Ala 92 and Phe 94 (see main text for details). Errors indicated are standard errors. In case of residues where less than 3  $k_{ex}$ -values are available no such error is given, since it cannot be determined.

## Supplementary Methods

**Materials.** Potassium pyrophosphate (KPPi) was from Sigma (Bornem, Belgium).  $^{15}\text{N}$  Ammonium chloride was purchased from Campro Scientific, Veenendaal, The Netherlands.

**Native state H/D exchange.** All equilibrium and kinetic folding experiments involving apoflavodoxin and flavodoxin were done at 25 °C using 100 mM KPPi as buffer<sup>30-32</sup>. Consequently, H/D exchange of the backbone amides of flavodoxin was measured using these sample conditions. To follow H/D exchange, lyophilized  $^{15}\text{N}$ -labelled flavodoxin was dissolved into  $\text{D}_2\text{O}$  to protein concentrations ranging from 2.5 to 3 mM in 100 mM KPPi at various pD-values (pD is the uncorrected pH meter reading of a deuterated solution). Each sample was immediately transferred into the NMR machine and subsequently a series of  $^1\text{H}$ - $^{15}\text{N}$  heteronuclear single quantum coherence (HSQC) spectra was recorded. Similarly prepared samples without protein were used to shim the magnetic field, tune the probe, and determine the length of the  $90^\circ$  proton pulse prior to the start of the H/D exchange experiment. The dead time of an exchange experiment (i.e., the difference in time between mixing  $\text{D}_2\text{O}$  with lyophilized protein and recording of the first HSQC spectrum) was approximately 5 minutes. pD was measured after finishing the exchange experiments. pD-values of the samples used were 6.19, 6.26, 7.73 and 8.82. The H/D exchange experiments done at pD 6.26 and 8.82 lasted 11 months and at pD 6.19 and 7.73 the experiments lasted 2 months. Similar to the above procedure, H/D exchange data were also recorded of 1.3 mM apoflavodoxin in 100 mM KPPi at pD 6.28 during an 8-week period. For the purpose of NMR spectral referencing, all protein samples contained 100  $\mu\text{M}$  3-(trimethylsilyl)-1-propane sulfonic acid (DSS).

**NMR spectroscopy and data processing.** Gradient-enhanced  $^1\text{H}$ - $^{15}\text{N}$  HSQC spectra<sup>50,51</sup> were recorded on a Bruker AMX 500 MHz machine. In all exchange experiments, the first 9 HSQC spectra were recorded with 1024 complex data points in the  $^1\text{H}$  dimension and 96 complex data points in the  $^{15}\text{N}$  dimension, using two scans per increment. Each HSQC spectrum took 8 minutes and 40 seconds to acquire. Subsequently, spectra with identical settings but with 256 complex data points in the indirect dimension were recorded. Now, each HSQC experiment lasted 22 minutes and 46 seconds. Sample temperature was 25 °C, as verified using 4% methanol in  $\text{d}_4$ -methanol.

Spectra were processed using Felix 2D (MSI, San Diego, CA, USA). In the direct  $^1\text{H}$  dimension, data were multiplied by a Gaussian function and zero filled to 2048 points prior to

Fourier transform. In the indirect  $^{15}\text{N}$  dimension data were zero filled once and multiplied by a squared cosine bell prior to Fourier transform. Assignments were adapted from <sup>49</sup> by a pD titration and temperature alteration to the conditions used here. Maximal intensities of backbone amide cross peaks were determined using macros and scripts provided by A. G. Palmer III (<http://www.palmer.hs.columbia.edu/software.html>).

**Hydrogen exchange data analysis.** To obtain  $k_{ex}$ , a single exponential function was fitted to the time-dependent maximal cross peak intensities of non-overlapping cross peaks:

$$I(t) = I(\infty) + C \cdot \exp(-k_{ex} \cdot t) \quad (\text{S1})$$

In equation S1,  $t$  is the time between initiation of H/D exchange and the start of an individual HSQC experiment,  $I(\infty)$  is the peak intensity at infinite time,  $C$  is the pre-exponential factor, and  $k_{ex}$  is the amide proton exchange rate. In an analogous manner, when a cross peak (labeled 1) partially overlaps with another one (labeled 2), a sum of two decaying exponentials was fitted to the time-dependent maximal intensity of cross peak-1 to obtain the corresponding  $k_{ex1}$ :

$$I(t) = I(\infty) + C1 \cdot \exp(-k_{ex1} \cdot t) + C2 \cdot \exp(-k_{ex2} \cdot t) \quad (\text{S2})$$

Some residues show initially that their cross peak intensity increases exponentially as time proceeds and as time progresses further this intensity decreases exponentially. This initial signal increase is attributed to H/D exchange of a relatively rapidly exchangeable proton in the immediate vicinity of the amide proton of interest. As a result, dipole-dipole interactions are affected, causing slower relaxation and concomitant sharpening of the cross peak of the backbone amide of interest. In cases where this phenomenon is observed, equation S2 was fitted to the time-dependent maximal cross peak intensities, using a negative value for parameter  $C2$ . Constant  $k_{ex2}$  is the rate constant for incorporation of a deuteron in immediate vicinity of the amide proton of interest, and  $k_{ex1}$  is the rate constant for H/D exchange of the amide proton of interest. Indeed, in most cases,  $k_{ex2}$  could be assigned to be due to exchange of an amide proton within hydrogen bonding distance of the amide of interest.

**Model for H/D exchange.** The time course of exchange can be monitored at the residue level by NMR spectroscopy, since amide protons give rise to a  $^1\text{H}$ -NMR signal, and replacement of the proton by a deuteron leads to disappearance of this signal.

Quantitative interpretation of H/D exchange is possible using a simple model<sup>38</sup>:

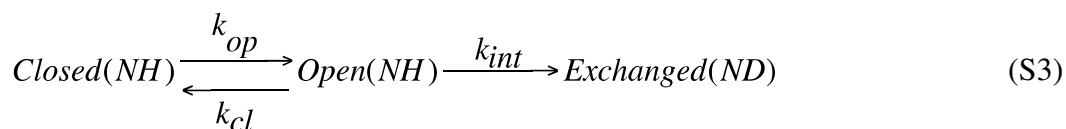

In this model, the open or exchange-competent form and the closed or exchange-incompetent form of a protein at the site of a particular amide proton interconvert with rate constants for opening,  $k_{op}$ , and closing,  $k_{cl}$ . From the open state, exchange takes place with the intrinsic rate constant  $k_{int}$ , which depends on amino acid sequence, pD, and temperature and can be calculated using values derived from work on model peptides<sup>40</sup>.

Under conditions favoring the closed state (i.e.  $k_{op} \ll k_{cl}$ ), the observed exchange rate,  $k_{ex}$ , equals:

$$k_{ex} = \frac{k_{op} \cdot k_{int}}{k_{cl} + k_{int}} \quad (\text{S4})$$

Above pD 4, amide proton exchange is base-catalyzed and  $k_{int}$  increases tenfold by every increase of pD by 1 unit. Depending on the ratio of  $k_{cl}$  and  $k_{int}$ , two limiting cases may be reached (Fig. 4a). If  $k_{cl} \ll k_{int}$  equation S4 reduces to:

$$k_{ex} = k_{op} \quad (\text{S5})$$

Under this so-called EX1 condition,  $k_{ex}$  of a certain amide proton informs about the rate constant for conversion between the closed and the open state of its micro-environment. If  $k_{cl} \gg k_{int}$  equation S4 reduces to:

$$k_{ex} = \frac{k_{op} \cdot k_{int}}{k_{cl}} = K_{op} \cdot k_{int} \quad (\text{S6})$$

Under this so-called EX2 condition, the ratio of  $k_{ex}$  and  $k_{int}$  provides the equilibrium constant  $K_{op}$  for opening of the protein structure at the backbone amide under investigation.  $K_{op}$  is a measure for the corresponding stability  $\Delta G_{op}$ :



$$\Delta G_{op} = -RT \ln(K_{op}) = -RT \ln\left(\frac{k_{op}}{k_{cl}}\right) = -RT \ln\left(\frac{k_{ex}}{k_{int}}\right) \quad (S7)$$

where  $R$  is the gas constant and  $T$  the absolute temperature.

To estimate the accuracy with which  $\Delta G_{op}$  is determined, we mutually compared on a residue basis  $\Delta G_{op}$ -values of 47 backbone amides of flavodoxin at pD 6.19 and at pD 6.26; these backbone amides exchange according to an EX2 mechanism at both pD-values (see Results section). The average difference in stability (i.e.,  $\Delta G_{op}(\text{pD} = 6.19) - \Delta G_{op}(\text{pD} = 6.26)$ ) for these 47 residues equals  $(0.28 \pm 0.35)$  kcal/mol. This average difference of 0.28 kcal/mol is probably due to slight stabilization of flavodoxin upon lowering pD. The value of 0.35 kcal/mol is a reasonable estimate of the standard deviation of  $\Delta G_{op}$ .

### **Determination of rate and equilibrium constants for FMN dissociation from flavodoxin.**

The dissociation constant of the apoflavodoxin–FMN complex was determined by us<sup>31</sup> using the very strong quenching of FMN fluorescence upon binding of FMN to apoflavodoxin<sup>35,52</sup>. FMN was obtained during the TCA-induced preparation of apoflavodoxin and purified by reverse-phase HPLC. A solution of 1.5 ml containing 188 nM FMN (based on the extinction coefficient at 445 nm of  $12.2 \text{ mM}^{-1} \text{ cm}^{-1}$ <sup>53</sup>) in 100 mM KPPi pH 6.0 was titrated with aliquots of 4.4  $\mu\text{M}$  apoflavodoxin in the same buffer. After each addition of protein, the system was allowed to equilibrate for 5 minutes in the dark. Subsequently, FMN fluorescence intensity was determined at 25 °C by using a Cary eclipse fluorimeter (Varian, Palo Alto, CA, USA). Excitation was at 445 nm with a slit of 5 nm; emission was recorded at 525 nm with a slit of 10 nm. The dissociation constant of the apoflavodoxin-FMN complex was determined by fitting the following equation to the observed quenching of fluorescence emission of FMN:

$$F = dF_{end} + F_{\delta} \cdot \left( dC_F - \frac{(C_A + K_D + dC_F) - \sqrt{(C_A + K_D + dC_F)^2 - 4C_A dC_F}}{2} \right) \quad (S8)$$

where  $F$  is the observed fluorescence intensity after each addition of apoflavodoxin,  $d$  the dilution factor (initial volume/total volume),  $F_{end}$  the remaining fluorescence intensity after titration (resulting from both fluorescence of flavodoxin and of traces of flavin impurities that are unable to bind to apoflavodoxin),  $F_{\delta}$  the difference in molar emission intensity between flavodoxin and free FMN,  $C_F$  the initial concentration of FMN,  $C_A$  the total protein

concentration (i.e. apoflavodoxin + flavodoxin), and  $K_D$  the dissociation constant of the apoflavodoxin-FMN complex. We determined apoprotein concentration by measuring absorbance, using an extinction coefficient of  $26.500 \text{ M}^{-1} \text{ cm}^{-1}$  at 280 nm. Equation S8 is derived for equimolar binding stoichiometry of FMN to apoflavodoxin. This equation is fitted to the data of Fig. 1a. The total protein concentration ( $C_A$ ) derived using this fit is identical to the apoprotein concentration as determined by absorption. Consequently, all apoflavodoxin binds FMN.

The rate constant for dissociation of FMN from flavodoxin,  $k_{off}$ , was determined by following the increase in fluorescence due to FMN release when flavodoxin was diluted in buffer. Upon dilution the following equilibrium is affected:

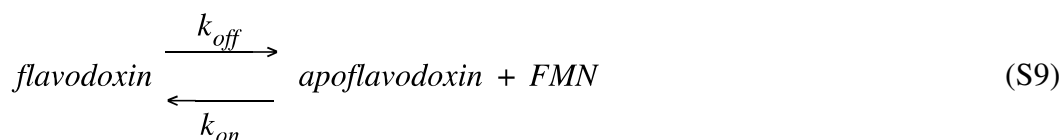

Return to equilibrium proceeds exponentially as function of time, as it is a first-order process, and the corresponding relaxation time is<sup>37</sup>:

$$1/\tau = k_{on} \cdot ([\text{apoflavodoxin}] + [\text{FMN}]) + k_{off} \quad (\text{S10})$$

where  $k_{on}$  is the association rate constant and  $k_{off}$  the dissociation rate constant, as shown in equation S9. From this dilution experiment the equilibrium constant for dissociation of FMN from flavodoxin can be retrieved as well, because  $K_D$  equals  $k_{off}/k_{on}$ .

During dilution experiments, 50, 20, 10 and 5  $\mu\text{l}$  of 362  $\mu\text{M}$  flavodoxin in 100 mM KPPI, pH 5.65, were added to 2000  $\mu\text{l}$  buffer, respectively. As a result, flavodoxin was diluted 41, 101, 201, and 401 times, respectively, and final protein concentrations were 8.8, 3.6, 1.8, and 0.9  $\mu\text{M}$ . Equilibrium of FMN dissociation was reached within 40 minutes. Fluorescence emission of FMN was followed at 525 nm with a slit of 10 nm using a Cary eclipse fluorimeter, while excitation occurred at 450 nm with a slit of 5 nm and sample temperature was set to 25 °C. To determine  $k_{off}$ , as well as  $K_D$ , the following equation was globally fitted to the four relaxation traces obtained, using ProFit (Quantumsoft, Zürich, Switzerland):

$$F(t) = A \cdot \exp(-t/\tau) + F(\infty) + c \quad (\text{S11})$$

where  $F$  is the observed fluorescence intensity of FMN,  $A$  is the amplitude of FMN fluorescence signal change upon dilution of flavodoxin,  $\tau$  is the relaxation time as described by equation S10 with  $k_{on}$  defined as  $k_{off}/K_D$ ,  $F(\infty)$  is the observed fluorescence of FMN after FMN release upon dilution of flavodoxin has reached equilibrium, and  $c$  is an adjustable parameter that accounts for offset observed in fluorescence, which is mainly caused by Raman scattering, and differs slightly per relaxation trace, due to among others small differences in cuvettes used. The initial concentration in nM of FMN in the stock of flavodoxin, as well as the final concentration of FMN after cofactor release upon dilution of flavodoxin has reached new equilibrium, is determined in both cases by  $K_D$ . Consequently, fluorescence of FMN at the start of the dilution experiment,  $F(0)$ , and FMN fluorescence upon reaching new equilibrium,  $F(\infty)$ , can be calculated according to:

$$F(0) = (\text{scaling factor}) \cdot \frac{-K_D + \sqrt{K_D^2 + 4 \cdot K_D \cdot 362 \cdot 10^{-6}}}{2} \cdot d \quad (\text{S12})$$

and

$$F(\infty) = (\text{scaling factor}) \cdot \frac{-K_D + \sqrt{K_D^2 + 4 \cdot K_D \cdot 362 \cdot 10^{-6} \cdot d}}{2} \quad (\text{S13})$$

with  $d$  the dilution factor, i.e., the volume taken out of the stock solution divided by the final volume of the sample, and the scaling factor is  $5 \cdot 10^9$ , as in our fluorescence emission set-up 1 nM of FMN corresponds to 5 fluorescence units. Hence, amplitude  $A$  in equation S11 is:

$$A = F(0) - F(\infty) \quad (\text{S14})$$

**Backbone amide exchange of apoflavodoxin and flavodoxin occurs according to an EX2 mechanism.** To reveal at the residue level how FMN affects the stabilities of flavodoxin's residues against exposure to solvent, we first need to measure H/D exchange rates of backbone amides of the apoprotein (Supplementary Table S1, pD is 6.28). As the residues of apoflavodoxin display EX2 behavior at pD 6.3<sup>32</sup>, these rates are directly converted into  $\Delta G_{op}$ -values using equation S7. Subsequently, we measure H/D exchange rates of the holoprotein to determine the corresponding  $\Delta G_{op}$ -values of flavodoxin (Supplementary Table S1, pD is 6.26). At pD 6.3 it is expected that backbone amides of flavodoxin exchange according to an EX2 mechanism, because: (a) flavodoxin is structurally largely identical to

apoflavodoxin<sup>49,34</sup>, (b) FMN does not accelerate flavodoxin folding<sup>31</sup>, (c) during global unfolding of flavodoxin release of FMN is rate-limiting<sup>31</sup>, and (d) stability against global protein unfolding increases considerably upon binding of FMN to apoflavodoxin<sup>31</sup>. When amide protons of flavodoxin exchange according to an EX2 mechanism, their exchange rates directly convert into corresponding  $\Delta G_{op}$ -values. Consequently, stabilization against exposure to solvent of the residues of apoflavodoxin upon FMN binding is described by  $(\Delta G_{op}(\text{flavodoxin}) - \Delta G_{op}(\text{apoflavodoxin})) = \Delta\Delta G_{op}$ .

To verify whether exchange of amides of flavodoxin indeed occurs according to an EX2 mechanism at pD 6.26, we measure H/D exchange also at pD 6.19, 7.73 and 8.82. Supplementary Table S2 lists exchange rates for 105 of the 179 backbone amides of flavodoxin.

The following 22 residues show EX2 exchange behavior over the entire pD range investigated (i.e.,  $\log(k_{ex})$  depends linearly on pD with a slope of about 1): Leu5, Gly8, Arg15, Val17, Lys19, Ile21, Lys22, Leu34, Ile81, Val91, Leu93, Gln99, Gly101, Tyr106, Leu110, Gly111, Lys118, Phe146, Val147, Ala150, Ala169, and Ile171. An example of this EX2 behavior is shown for Leu34 in Fig. 4b. In case of the following six residues  $\log(k_{ex})$  depends linearly on pD with a slope ranging in between 1.6 to 1.9: Lys16, Phe77, Val125, Trp128, Val141, and Gln170. Apparently, the corresponding backbone amides, which all reside at flavodoxin's periphery, have stabilities against exposure to solvent that decrease upon increasing pD from 6.19 to 8.82.

In case of Lys13,  $\log(k_{ex})$  decreases with increasing pD (Supplementary Figure S4a). The backbone amide proton of Lys13 is hydrogen bonded to the phosphate of FMN (Supplementary Figure S4b). The pK of this phosphate is 5.5 (i.e., mono-anion to di-anion transition)<sup>54</sup>. Deprotonation of this phosphate upon increasing pD explains the exchange behavior observed for Lys13, because this event strengthens the hydrogen bond discussed. However, this strengthening does not significantly reinforce binding between FMN and apoflavodoxin. If FMN binding would become stronger, several other amide protons of flavodoxin should also display a decrease of  $k_{ex}$  upon increasing pD, which is not observed.

Five residues (i.e., Thr14, Thr56, Asp98, Tyr102, and Gly148) have  $\log(k_{ex})$ -values that show a curved dependency on pD. An example of such curved data is shown for Thr56 in Fig. 4b. Clearly, at pD 6.26 this residue exchanges according to an EX2 mechanism, just as is the case for the other four residues mentioned.

Due to overlap of <sup>1</sup>H-<sup>15</sup>N cross peaks,  $k_{ex}$  of Phe7, Ala92, Leu96, Asp108, Tyr114, and Leu168 can only be determined at pD 8.82. Similarly, exchange rates of Phe6, Leu50 - Thr54, Phe94, Gly95, Val100, and Trp167 can only be retrieved from HSQC spectra acquired

at pD 6.26 and 8.82. Increase of the exchange rates of Phe6, Leu50 - Gly53, and Phe94 in this pD-range is consistent with exchange moving from an EX2 mechanism at pD 6.26 to an EX1 mechanism at pD 8.82. A partial move towards an EX1 mechanism in this pD regime occurs for Thr54, Gly95, Val100, and Trp167.

Of fifty-five residues  $k_{ex}$  could only be determined at pD 6.19 or 6.26 or at both pD-values, but not at higher pD-values, because upon increasing pD exchange becomes so rapid that the corresponding amide protons fully exchange with deuterons within the dead time of the exchange experiment. These residues are: Ile3, Lys23 - Phe25, Thr29 - Ser31, Ala33, Asn37 - Val39, Ala45 - Tyr47, Phe49, Leu57, Gly58, Gly60, Glu61, Gly64, Leu65, Ser73 - Glu76, Lys80, Glu82, Leu84, Lys89, Asn105, Glu112, Leu113, Asp119 - Gly121, Lys123, Ile124, Asp131, Tyr133 - Phe135, Ser137, Glu139, Val142, Asp143, Lys145, Leu151, Leu153, Asp154, Asn155, Arg163, Ala172, Glu174, Phe175, and Leu177. This strong dependence on pD supports that exchange of these residues occurs according to an EX2 mechanism at pD 6.26. In summary, the wealth of exchange data collected support that at pD 6.26 exchange of backbone amides of flavodoxin indeed occurs according to an EX2 mechanism.

### Supplementary References

49. Steensma, E. et al. Apparent local stability of the secondary structure of *Azotobacter vinelandii* holoflavodoxin II as probed by hydrogen exchange: implications for redox potential regulation and flavodoxin folding. *Protein Sci* **7**, 306-17 (1998).
50. Palmer III, A.G., Cavanagh, J., Wright, P.E. & Rance, M. Sensitivity improvement in proton-detected two-dimensional heteronuclear correlation NMR spectroscopy. *J Magn Reson* **93**, 151-170 (1991).
51. Kay, L.E., Keifer, P. & Saarinen, T. Pure absorption gradient enhanced heteronuclear single quantum correlation spectroscopy with improved sensitivity. *J Am Chem Soc* **114**, 10663-10665 (1992).
52. Mayhew, S.G. & Wassink, J.H. Determination of FMN and FAD by fluorescence titration with apoflavodoxin. *Methods Enzymol* **66**, 217-20 (1980).
53. Lostao, A., Gomez-Moreno, C., Mayhew, S.G. & Sancho, J. Differential stabilization of the three FMN redox forms by tyrosine 94 and tryptophan 57 in flavodoxin from *Anabaena* and its influence on the redox potentials. *Biochemistry* **36**, 14334-44 (1997).

54. MacKnight, M.L., Gillard, J.M. & Tollin, G. Flavine-protein interactions in flavoenzymes. pH dependence of the binding of flavine mononucleotide and riboflavine to *Azotobacter* flavodoxin. *Biochemistry* **12**, 4200-6. (1973).
55. Kraulis, P.J. MOLSCRIPT: A program to produce both detailed and schematic plots of protein structures. *J Appl Cryst* **24**, 946-950 (1991).
